# Supplementary material
Source: Research Square preprint supplement (doi:10.21203/rs.3.rs-10007778/v1)
Supplement: Supplementary file 1 [file d03a234e22f667640c024dc6.doc]

**Table 1**. Total organic carbon content (TOC wt.%) and Rock-Eval pyrolysis results of the studied organic-rich carbonate samples of the Lam Member from five exploration wells (i.e., Bin Haydar-1, Misah-1, Tubba-1, Al Jamilah-1, and Al Maz-1) in the Shabwah depression of southeastern Yemen.

| **Wells** | **Depth (m)** | **TOC Wt.%** | **Rock-Eval pyrolysis** | | | | | **Wells** | **Depth (m)** | **TOC Wt.%** | **Rock-Eval pyrolysis** | | | | |
| --- | --- | --- | --- | --- | --- | --- | --- | --- | --- | --- | --- | --- | --- | --- | --- |
| ***S*1 (mg/g)** | ***S*2 (mg/g)** | **HI**  **(mg/g)** | **Tmax (oC)** | **PI** | ***S*1 (mg/g)** | ***S*2 (mg/g)** | **HI**  **(mg/g)** | **Tmax (oC)** | **PI** |
| **Bin Haydar-1** | 2560 | 4.14 | 2.90 | 20.76 | 501 | 435 | 0.12 | **Tubba**-1 | 1935 | 1.38 | 0.66 | 3.04 | 220 | 440 | 0.18 |
| 2570 | 1.29 | 1.00 | 4.53 | 351 | 433 | 0.18 | 1940 | 1.52 | 0.72 | 3.81 | 251 | 436 | 0.16 |
| 2580 | 3.15 | 1.89 | 12.91 | 410 | 435 | 0.13 | 1960 | 1.07 | 0.59 | 2.85 | 266 | 440 | 0.17 |
| 2590 | 1.30 | 0.65 | 4.07 | 313 | 434 | 0.14 | 1980 | 0.84 | 0.52 | 2.18 | 260 | 441 | 0.19 |
| 2600 | 1.70 | 1.25 | 8.09 | 476 | 436 | 0.13 | 1990 | 1.09 | 0.74 | 3.03 | 278 | 440 | 0.20 |
| 2610 | 2.90 | 1.72 | 10.94 | 377 | 438 | 0.14 | 2010 | 1.35 | 0.76 | 4.15 | 307 | 438 | 0.15 |
| 2620 | 3.98 | 2.56 | 18.30 | 460 | 436 | 0.12 | 2045 | 1.69 | 0.89 | 5.03 | 298 | 440 | 0.15 |
| 2630 | 7.46 | 4.46 | 29.32 | 393 | 438 | 0.13 | 2050 | 1.29 | 0.68 | 3.78 | 293 | 437 | 0.15 |
| 2640 | 2.29 | 1.43 | 7.67 | 335 | 435 | 0.16 | **Al Jamilah-1** | 2334 | 1.33 | 0.62 | 1.85 | 139 | 430 | 0.25 |
| 2650 | 5.16 | 3.96 | 24.06 | 466 | 439 | 0.14 | 2522 | 2.17 | 0.55 | 4.43 | 204 | 429 | 0.11 |
| 2657 | 8.17 | 4.85 | 37.21 | 455 | 445 | 0.12 | 2494 | 3.00 | 0.57 | 6.30 | 210 | 431 | 0.08 |
| 2658 | 2.79 | 2.92 | 10.86 | 389 | 444 | 0.21 | 2560 | 1.45 | 0.14 | 0.76 | 52 | 435 | 0.16 |
| 2663 | 3.43 | 1.95 | 14.36 | 419 | 444 | 0.12 | 2578 | 6.80 | 1.70 | 16.80 | 247 | 433 | 0.09 |
| 2670 | 6.81 | 4.56 | 24.31 | 357 | 440 | 0.16 | 2590 | 3.09 | 0.54 | 5.73 | 185 | 429 | 0.09 |
| 2680 | 5.67 | 4.97 | 25.01 | 441 | 436 | 0.17 | 2624 | 3.87 | 0.60 | 5.69 | 147 | 432 | 0.10 |
| 2690 | 4.07 | 4.45 | 18.50 | 455 | 436 | 0.19 | 2652 | 5.98 | 0.92 | 12.39 | 207 | 431 | 0.07 |
| 2700 | 3.35 | 2.60 | 13.39 | 400 | 436 | 0.16 | 2666 | 6.17 | 1.29 | 11.92 | 193 | 437 | 0.10 |
| 2705 | 1.16 | 0.55 | 1.95 | 168 | 436 | 0.22 | 2686 | 3.66 | 0.62 | 5.81 | 159 | 433 | 0.10 |
| 2708 | 1.57 | 0.83 | 3.01 | 192 | 443 | 0.22 | 2698 | 2.14 | 0.42 | 3.63 | 170 | 438 | 0.10 |
| 2711 | 2.65 | 3.86 | 11.29 | 426 | 445 | 0.25 | 2724 | 3.70 | 0.82 | 7.70 | 208 | 439 | 0.10 |
| 2720 | 5.19 | 2.56 | 22.43 | 432 | 438 | 0.10 | 2746 | 3.56 | 0.73 | 6.32 | 178 | 438 | 0.10 |
| 2730 | 4.36 | 2.35 | 17.75 | 407 | 437 | 0.12 | 2768 | 3.75 | 1.06 | 7.00 | 187 | 440 | 0.13 |
| 2740 | 3.59 | 2.06 | 12.59 | 351 | 435 | 0.14 | 2782 | 4.70 | 1.08 | 6.78 | 144 | 436 | 0.14 |
| 2742 | 1.96 | 0.99 | 5.23 | 267 | 447 | 0.16 | 2804 | 4.25 | 0.91 | 5.20 | 122 | 442 | 0.15 |
| 2744 | 3.70 | 1.52 | 13.57 | 367 | 442 | 0.10 | 2838 | 4.11 | 0.69 | 5.33 | 130 | 443 | 0.11 |
| 2746 | 3.37 | 1.29 | 9.50 | 282 | 445 | 0.12 | 2874 | 3.21 | 0.59 | 3.44 | 107 | 442 | 0.15 |
| 2750 | 3.02 | 1.42 | 9.35 | 310 | 436 | 0.13 | 2906 | 4.06 | 0.75 | 3.21 | 79 | 440 | 0.19 |
| 2760 | 8.40 | 4.27 | 40.24 | 479 | 438 | 0.10 | 2942 | 2.05 | 0.19 | 0.89 | 43 | 438 | 0.18 |
| **Misah-1** | 2500 | 0.98 | 0.27 | 2.17 | 221 | 442 | 0.11 | 3094 | 2.58 | 0.14 | 0.95 | 37 | 436 | 0.13 |
| 2510 | 0.94 | 0.34 | 2.12 | 226 | 443 | 0.14 | **Al Maz-1** | 2105 | 1.07 | 0.48 | 2.02 | 189 | 440 | 0.19 |
| 2520 | 0.83 | 0.18 | 1.8 | 217 | 441 | 0.09 | 2150 | 3.96 | 3.60 | 11.40 | 288 | 438 | 0.24 |
| 2530 | 1.17 | 0.52 | 2.46 | 210 | 443 | 0.17 | 2166 | 1.87 | 0.83 | 3.29 | 176 | 442 | 0.20 |
| 2540 | 2.01 | 0.85 | 4.21 | 209 | 442 | 0.17 | 2211 | 1.68 | 0.78 | 2.74 | 163 | 441 | 0.22 |
| 2550 | 2.07 | 0.86 | 4.57 | 221 | 445 | 0.16 | 2227 | 4.37 | 1.69 | 9.92 | 227 | 441 | 0.15 |
| 2560 | 1.70 | 0.62 | 3.92 | 231 | 444 | 0.14 | 2242 | 3.08 | 1.38 | 5.39 | 175 | 442 | 0.20 |
| 2570 | 2.39 | 0.73 | 5.92 | 248 | 445 | 0.11 | 2288 | 1.60 | 0.60 | 2.62 | 164 | 442 | 0.19 |
| 2580 | 2.01 | 0.69 | 4.89 | 243 | 445 | 0.12 | 2318 | 5.21 | 1.95 | 11.77 | 226 | 442 | 0.14 |
| 2590 | 2.10 | 0.6 | 5.81 | 277 | 444 | 0.09 | 2379 | 2.73 | 1.10 | 4.72 | 173 | 445 | 0.19 |
| 2600 | 2.70 | 0.83 | 7.87 | 291 | 444 | 0.10 | 2410 | 1.66 | 0.74 | 2.32 | 140 | 446 | 0.24 |
| 2610 | 2.68 | 0.73 | 8.66 | 323 | 443 | 0.08 | 2471 | 3.49 | 0.95 | 4.78 | 137 | 452 | 0.17 |
| 2620 | 3.56 | 0.83 | 12.5 | 351 | 443 | 0.06 |  | | | | | | | |
| 2630 | 2.44 | 0.69 | 8.82 | 361 | 442 | 0.07 |

**TOC- Total organic carbon (wt%), *S*1: Volatile hydrocarbon (HC) content, mg HC/ g rock, *S*2: Remaining HC generative potential, mg HC/ g rock,**

**Tmax: Temperature at maximum of *S*2 peak, HI: Hydrogen Index = *S*2x 100 / TOC, mg HC/ g TOC, PI: Production Index = *S1/(S*1+*S*2),**

**Table 2**. Elemental analysis and palynofacies results of the studied organic-rich carbonate samples of the Lam Member from one exploration well (i.e., Bin Haydar-1) in the Shabwah depression, southeastern Yemen.

| **Wells** | **Depth (m)** | **Elemental analysis results** | | | | | | | | **Fe**  **(%)** | **Palynofacies results** | | | **Kerogen Typing** |
| --- | --- | --- | --- | --- | --- | --- | --- | --- | --- | --- | --- | --- | --- | --- |
| **C**  **(%)** | **H**  **(%)** | **N**  **(%)** | **O**  **(%)** | **S**  **(%)** | **H/C** | **O/C** | **S/C** | **AOM** | **Palynomorphs** | **Phytoclasts** |
| **Bin Haydar-1** | **2560** |  |  |  |  |  |  |  |  |  | 70 | 20 | 10 | II/I |
| **2630** |  |  |  |  |  |  |  |  |  | 80 | 5 | 15 | II/I |
| **2657** | 72.54 | 6.17 | 1.8 | 11.03 | 8.46 | 1.02 | 0.11 | 0.04 | 5.27 | 75 | 5 | 20 | II |
| **2663** | 68.32 | 5.82 | 1.64 | 12.89 | 11.33 | 1.02 | 0.14 | 0.06 | 8.22 | 90 |  | 10 | II/I |
| **2711** | 63.52 | 5.24 | 1.29 | 15.78 | 14.17 | 0.99 | 0.19 | 0.08 | 11.17 | 60 | 35 | 5 | II |
| **2720** |  |  |  |  |  |  |  |  |  | 60 | 20 | 20 | II |
| **2746** | 54.98 | 4.48 | 1.13 | 20.56 | 18.85 | 0.98 | 0.28 | 0.13 | 15.53 | 60 | 30 | 10 | II |
| **2760** |  |  |  |  |  |  |  |  |  | 80 | 10 | 10 | II/I |

**C- Carbon, H-Hydrogen, N-Nitrogen, O-Oxygen, S-Sulfur, Fe-Iron, AOM-amorphous organic matter**

**Table 1.** Geochemical results for the studied organic-rich carbonate samples of the Lam Member from three exploration wells (i.e., Al Maz-1, Misah-1 and Bin Haydar-1) in the in the Shabwah depression, southeastern Yemen, illustrating carbon isotope and selected saturated biomarker parameters for source of organic matter, and depositional conditions

| **Wells** | **Depth (m)** | **Carbon isotope compositions (‰)** | | ***n*-alkanes and isoprenoids (GC)** | | | | | **Triterpanes and terpanes (GC-MS*-m/z* 191)** | | | | | | | | **Steranes (GC-MS*-m/z* 217)** | | | |
| --- | --- | --- | --- | --- | --- | --- | --- | --- | --- | --- | --- | --- | --- | --- | --- | --- | --- | --- | --- | --- |
| **δ13CSat.** | **δ13CAro.** | **Pr/Ph** | **Pr/C17** | **Ph/C18** | **CPI** | **WI** | **C29/C30** | **Ts/Tm** | **C31R/C30** | **G/C30** | **C25Ti/ C26Ti** | **C24Te/ C26Ti** | **C23Ti/ C24Ti** | **Regular steranes (%)** | | | | **C29/C27** |
| **C27** | | **C28** | **C29** |
| **Al Maz-1** | 2166 | -28.40 | -26.20 | 0.30 | 0.55 | 1.20 | 0.95 | 0.85 | 0.39 | 4.77 | 0.30 | 0.53 | 1.44 | 1.44 | 1.52 | 41 | | 21 | 38 | 0.93 |
| 2227 | -26.60 | -25.40 | 0.30 | 0.73 | 2.16 | 0.92 | 0.76 | 0.43 | 2.44 | 0.27 | 0.40 | 1.31 | 1.82 | 1.46 | 44 | | 24 | 32 | 0.73 |
| 2318 | -27.40 | -25.40 | 0.65 | 0.56 | 0.71 | 1.00 | 0.98 | 0.56 | 2.19 | 0.39 | 0.57 | 1.36 | 1.38 | 1.29 | 46 | | 21 | 33 | 0.72 |
| 2471 | -26.70 | -26.00 | 0.61 | 0.46 | 0.61 | 1.08 | 0.89 | 0.74 | 1.62 | 0.33 | 0.61 | 1.05 | 1.50 | 1.89 | 28 | | 29 | 43 | 1.54 |
| **Misah-1** | 2620 |  |  | 0.76 | 0.43 | 0.68 | 0.96 | 0.56 | 0.60 | 1.68 | 0.30 | 0.13 | 1.23 | 2.33 | 1.27 | 38 | | 22 | 40 | 1.05 |
| 2630 |  |  | 0.89 | 0.62 | 1.08 | 1.01 | 0.79 | 0.56 | 1.83 | 0.27 | 0.12 | 1.63 | 3.67 | 1.63 | 37 | | 23 | 40 | 1.08 |
| **Bin Haydar-1** | 2630 | -29.59 | -27.48 | 1.00 | 0.64 | 0.73 | 1.10 | 0.88 | 0.40 | 1.36 | 0.39 | 0.10 | 1.68 | 1.28 | 1.21 | 38 | | 26 | 36 | 0.95 |
| 2658 | -29.15 | -27.93 | 1.21 | 0.64 | 0.57 | 0.99 | 1.23 | 0.40 | 1.57 | 0.34 | 0.07 | 1.82 | 1.82 | 1.18 | 39 | | 25 | 36 | 0.92 |
| 2666 |  |  | 1.26 | 0.64 | 0.62 | 1.05 | 1.34 | 0.45 | 1.44 | 0.34 | 0.09 | 1.59 | 1.89 | 1.31 | 42 | | 23 | 35 | 0.83 |
| 2670 | -28.96 | -27.75 | 1.14 | 0.63 | 0.62 | 1.09 | 0.89 | 0.36 | 1.49 | 0.26 | 0.07 | 0.88 | 1.25 | 1.02 | 37 | | 24 | 39 | 1.05 |
| 2711 |  |  | 1.23 | 0.67 | 0.58 | 1.11 | 0.78 | 0.38 | 1.58 | 0.32 | 0.08 | 1.45 | 1.55 | 1.15 | 39 | | 24 | 37 | 0.95 |
| 2744 | -28.51 | -27.09 | 1.18 | 0.78 | 0.61 | 1.10 | 1.10 | 0.35 | 1.35 | 0.26 | 0.06 | 1.33 | 1.47 | 1.03 | 39 | | 25 | 36 | 0.92 |
| 2760 | -28.50 | -26.18 | 1.23 | 0.59 | 0.56 | 1.09 | 1.25 | 0.33 | 1.40 | 0.27 | 0.07 | 1.42 | 2.04 | 1.56 | 40 | | 25 | 35 | 0.88 |

**Pr= Pristane; Ph= Phytane; CPI= Carbon preference index (2[C23 + C25 + C27 + C29]/[C22 +2{C24 + C26 + C28}+C30]), WI= Waxiness index = Σ (*n*-C21- *n*-C31)/Σ (*n*-C15- *n*-C20),**

**Ts= (C27 18α(H)-22,29,30-trisnorneohopane); Tm= (C27 17α(H)-22,29,30-trisnorhopane), C29/C30 = C29 norhopane/ C30 hopane;**

**C31R/C30= C31R homohopane/C30 hopane; G/C30 = C35 homohopane/C30 hopane.**
